# Supplementary material for: Integration of genome-wide mRNA and miRNA expression, and DNA methylation data of three cell lines exposed to ten carbon nanomaterials
Source: PubMed Central journal article supplement (PMC6140287; doi:10.1016/j.dib.2018.05.107), 2018-05-25

# Pathway map

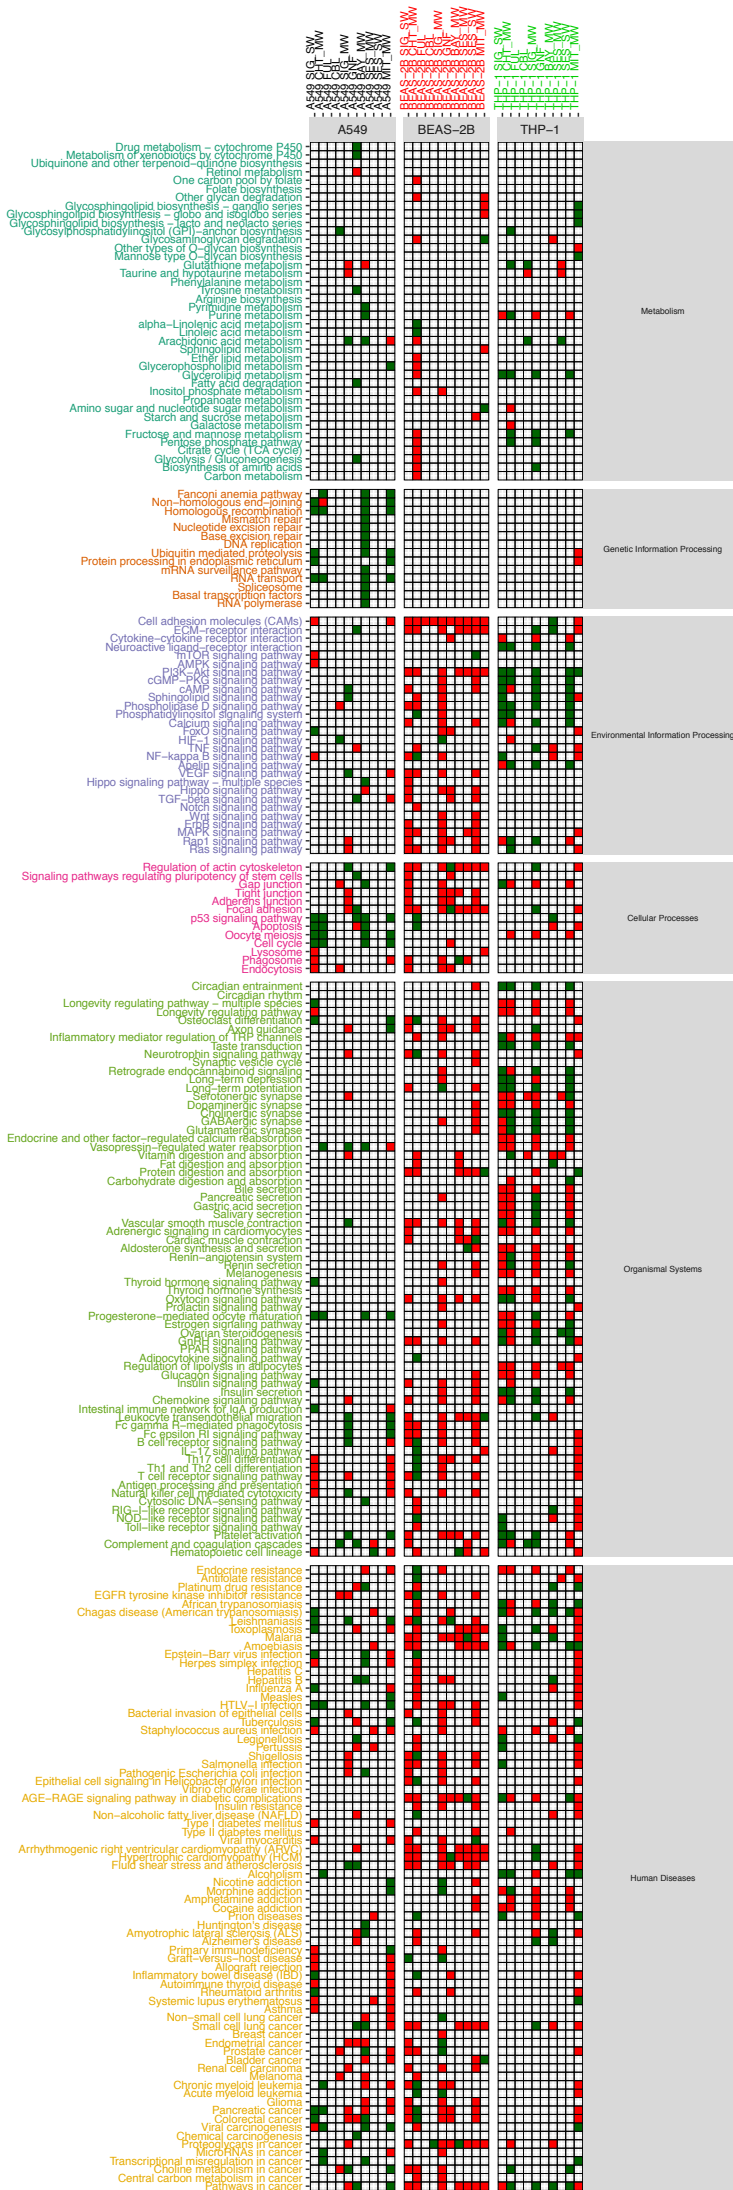

Supplement: mmc2.pdf [file mmc2.pdf]
